# Supplementary material for: Outpatient Oral Neuropathic Pain Management with Photobiomodulation Therapy: A Prospective Analgesic Pharmacotherapy-Paralleled Feasibility Trial
Source: MDPI journal article supplement (doi:10.3390/antiox11030533), 2022-03-10
Supplement: s1 [file s1]

Supplementary File S2: List of abbreviations (In alphabetical order)

| Sr.no. | Abbreviation       | Full form                                                                  |
|--------|--------------------|----------------------------------------------------------------------------|
| 1.     | ATP                | Adenosine triphosphate                                                     |
| 2.     | ANOVA              |                                                                            |
| 3.     | b-FGF              | Basic fibroblast growth factor                                             |
| 4.     | BMS                | Burning mouth syndrome                                                     |
| 5.     | cAMP               | Cyclic adenosine 3',5'-monophosphate                                       |
| 6.     | COX- 2             | Cyclooxygenase-2                                                           |
| 7.     | CCO                | Cytochrome C oxidase                                                       |
| 8.     | EQ-5D-5L           | European quality of life-5 dimensions-5 levels                             |
| 9.     | EQ VAS             | Euro QoL- visual analogue scale                                            |
| 10.    | GAD-7              | Generalized Anxiety Disorder 7-item scale                                  |
| 11.    | HANDS              | Hospital anxiety and depression scale                                      |
| 12.    | OIN                | Oral iatrogenic neuropathy                                                 |
| 13.    | OINI               | Oral iatrogenic nerve injury                                               |
| 14.    | IASP               | International Association of Study Pain.                                   |
| 15.    | ICHD               | International Classification of Headache Disorders                         |
| 16.    | IL- 1 $\beta$      | Interleukin-1 beta                                                         |
| 17.    | IL-6               | Interleukin-6                                                              |
| 18.    | IF- $\gamma$       | Interferon- gamma                                                          |
| 19.    | IMMPACT II         | Initiative on Methods, Measurement, and Pain Assessment in Clinical Trials |
| 20.    | J                  | Joule                                                                      |
| 21.    | J/cm <sup>2</sup>  | Joules per square centimeter                                               |
| 22.    | IFBMS              | Local factors burning mouth syndrome                                       |
| 23.    | LLLT               | Low level laser therapy                                                    |
| 24.    | $\mu$ m            | Micrometer                                                                 |
| 25.    | mJ                 | Millijoule                                                                 |
| 26.    | mm                 | Millimetre                                                                 |
| 27.    | mW                 | Milliwatt                                                                  |
| 28.    | NGF                | Nerve growth factor                                                        |
| 29.    | NP                 | Neuropathic pain                                                           |
| 30.    | McGill PQ          | McGill pain questionnaires                                                 |
| 31.    | MED                | Pharmacotherapy group                                                      |
| 32.    | Min/s              | Minute/s                                                                   |
| 33.    | mRNA               | Messenger Ribonucleic acid                                                 |
| 34.    | nm                 | Nanometer                                                                  |
| 35.    | NO                 | Nitric oxide                                                               |
| 36.    | OHIP-14            | Oral Health Impacts Profile                                                |
| 37.    | PBM                | Photobiomodulation                                                         |
| 38.    | PBM group          | Photobiomodulation therapy group                                           |
| 40.    | PGE 2              | Prostaglandin E2                                                           |
| 41.    | PGI-I              | Patients Global Impression of Improvement                                  |
| 42.    | PIS <sub>max</sub> | Pain intensity score (maximum)                                             |
| 43.    | PI                 | Pain intensity                                                             |
| 44.    | PPI                | Pressure pain intensity                                                    |
| 45.    | PROMs              | Patient reported outcome measure                                           |
| 46.    | QoL                | Quality of life                                                            |
| 47.    | ROS                | Reactive oxidase species                                                   |

|     |                   |                                                    |
|-----|-------------------|----------------------------------------------------|
| 48. | RCT               | Randomised clinical trials                         |
| 49. | SAD               | Social Anxiety Disorder                            |
| 50. | SD                | Standard deviation                                 |
| 51. | sec/s             | Second/s                                           |
| 52. | SFBMS             | Systemic factors burning mouth syndrome            |
| 53. | SF-36             | Short-Form Health Survey                           |
| 54. | SCL-90-R          | Psychometric Symptom Checklist 90-R                |
| 55. | T0                | Pre-treatment (Baseline)                           |
| 56. | T1                | Mid-treatment (end 5 <sup>th</sup> session)        |
| 57. | T2                | End-treatment (end 10 <sup>th</sup> session)       |
| 58. | T3                | One-month follow-up                                |
| 59. | T4                | Three-month follow-up                              |
| 60. | T5                | Six-months follow-up                               |
| 61. | T6                | Nine-months follow-up                              |
| 62. | TGF- $\beta$ 1    | Transforming growth factor beta                    |
| 63. | TNF- $\alpha$     | Tumor necrosis factor- alpha                       |
| 64. | <i>t</i> -test    |                                                    |
| 64. | TN                | Trigeminal nerve                                   |
| 65. | TRPV1             | selective transient receptor potential vanilloid 1 |
| 66. | VAS               | Visual analogue scale                              |
| 67. | VEGF              | Vascular endothelial growth factor                 |
| 68. | W                 | Watt                                               |
| 69. | W/cm <sup>2</sup> | Watt per quare centimetre                          |
| 70. | %                 | percentage                                         |
