# Supplementary material for: Outpatient Oral Neuropathic Pain Management with Photobiomodulation Therapy: A Prospective Analgesic Pharmacotherapy-Paralleled Feasibility Trial
Source: MDPI journal article supplement (doi:10.3390/antiox11030533), 2022-03-10
Supplement: s1 [file s1]

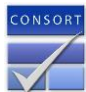

Supplementary File S1: CONSORT 2010 checklist of information to include when reporting a pilot or feasibility trial

| Section/Topic                    | Item No | Checklist item                                                                                                                                                                             | Reported on page No |
|----------------------------------|---------|--------------------------------------------------------------------------------------------------------------------------------------------------------------------------------------------|---------------------|
| <b>Title and abstract</b>        |         |                                                                                                                                                                                            |                     |
|                                  | 1a      | Identification as a pilot or feasibility randomised trial in the title                                                                                                                     | 1,2                 |
|                                  | 1b      | Structured summary of pilot trial design, methods, results, and conclusions (for specific guidance seeCONSORT abstract extension for pilot trials)                                         | 1,2                 |
| <b>Introduction</b>              |         |                                                                                                                                                                                            |                     |
| Background and objectives        | 2a      | Scientific background and explanation of rationale for future definitive trial, and reasons for randomised pilottrial                                                                      | 2,3,4               |
|                                  | 2b      | Specific objectives or research questions for pilot trial                                                                                                                                  | 4                   |
| <b>Methods</b>                   |         |                                                                                                                                                                                            |                     |
| Trial design                     | 3a      | Description of pilot trial design (such as parallel, factorial) including allocation ratio                                                                                                 | 5                   |
|                                  | 3b      | Important changes to methods after pilot trial commencement (such as eligibility criteria), with reasons                                                                                   | N/A                 |
| Participants                     | 4a      | Eligibility criteria for participants                                                                                                                                                      | 5,6                 |
|                                  | 4b      | Settings and locations where the data were collected                                                                                                                                       | 5                   |
|                                  | 4c      | How participants were identified and consented                                                                                                                                             | 4                   |
| Interventions                    | 5       | The interventions for each group with sufficient details to allow replication, including how and when they were actually administered                                                      | 8,9                 |
| Outcomes                         | 6a      | Completely defined prespecified assessments or measurements to address each pilot trial objective specified in2b, including how and when they were assessed                                | 11,12               |
|                                  | 6b      | Any changes to pilot trial assessments or measurements after the pilot trial commenced, with reasons                                                                                       | N/A                 |
|                                  | 6c      | If applicable, prespecified criteria used to judge whether, or how, to proceed with future definitive trial                                                                                | N/A                 |
| Sample size                      | 7a      | Rationale for numbers in the pilot trial                                                                                                                                                   | 11                  |
|                                  | 7b      | When applicable, explanation of any interim analyses and stopping guidelines                                                                                                               | N/A                 |
| Randomisation:                   |         |                                                                                                                                                                                            |                     |
| Sequence generation              | 8a      | Method used to generate the random allocation sequence                                                                                                                                     |                     |
|                                  | 8b      | Type of randomisation(s); details of any restriction (such as blocking and block size)                                                                                                     | N/A                 |
| Allocation concealment mechanism | 9       | Mechanism used to implement the random allocation sequence (such as sequentially numbered containers),describing any steps taken to conceal the sequence until interventions were assigned | N/A                 |

|                                                      |     |                                                                                                                                                                                       |       |
|------------------------------------------------------|-----|---------------------------------------------------------------------------------------------------------------------------------------------------------------------------------------|-------|
| Implementation                                       | 10  | Who generated the random allocation sequence, who enrolled participants, and who assigned participants to interventions                                                               | 11    |
| Blinding                                             | 11a | If done, who was blinded after assignment to interventions (for example, participants, care providers, those assessing outcomes) and how                                              | 11    |
|                                                      | 11b | If relevant, description of the similarity of interventions                                                                                                                           | N/A   |
| Statistical methods                                  | 12  | Methods used to address each pilot trial objective whether qualitative or quantitative                                                                                                | 11,12 |
| <b>Results</b>                                       |     |                                                                                                                                                                                       |       |
| Participant flow (a diagram is strongly recommended) | 13a | For each group, the numbers of participants who were approached and/or assessed for eligibility, randomly assigned, received intended treatment, and were assessed for each objective | 13    |
|                                                      | 13b | For each group, losses and exclusions after randomisation, together with reasons                                                                                                      | 13    |
| Recruitment                                          | 14a | Dates defining the periods of recruitment and follow-up                                                                                                                               | 14    |
|                                                      | 14b | Why the pilot trial ended or was stopped                                                                                                                                              | N/A   |
| Baseline data                                        | 15  | A table showing baseline demographic and clinical characteristics for each group                                                                                                      | 14    |
| Numbers analysed                                     | 16  | For each objective, number of participants (denominator) included in each analysis. If relevant, these numbers should be by randomised group                                          | 12-18 |
| Outcomes and estimation                              | 17  | For each objective, results including expressions of uncertainty (such as 95% confidence interval) for any estimates. If relevant, these results should be by randomised group        | 12-18 |
| Ancillary analyses                                   | 18  | Results of any other analyses performed that could be used to inform the future definitive trial                                                                                      | N/A   |
| Harms                                                | 19  | All important harms or unintended effects in each group (for specific guidance see CONSORT for harms)                                                                                 |       |
|                                                      | 19a | If relevant, other important unintended consequences                                                                                                                                  | N/A   |
| <b>Discussion</b>                                    |     |                                                                                                                                                                                       |       |
| Limitations                                          | 20  | Pilot trial limitations, addressing sources of potential bias and remaining uncertainty about feasibility                                                                             | 19-25 |
| Generalisability                                     | 21  | Generalisability (applicability) of pilot trial methods and findings to future definitive trial and other studies                                                                     | 24,25 |
| Interpretation                                       | 22  | Interpretation consistent with pilot trial objectives and findings, balancing potential benefits and harms, and considering other relevant evidence                                   | 19-25 |
|                                                      | 22a | Implications for progression from pilot to future definitive trial, including any proposed amendments                                                                                 | 24,25 |

|                          |    |                                                                                            |                        |
|--------------------------|----|--------------------------------------------------------------------------------------------|------------------------|
| <b>Other information</b> |    |                                                                                            |                        |
| Registration             | 23 | Registration number for pilot trial and name of trial registry                             | Registered 177<br>NCPC |
| Protocol                 | 24 | Where the pilot trial protocol can be accessed, if available                               | N/A                    |
| Funding                  | 25 | Sources of funding and other support (such as supply of drugs), role of funders            | N/A                    |
|                          | 26 | Ethical approval or approval by research review committee, confirmed with reference number | Registered 177<br>NCPC |
